# Supplementary material for: Arbuscular Mycorrhizal Symbiosis Differentially Affects the Nutritional Status of Two Durum Wheat Genotypes under Drought Conditions
Source: MDPI journal article supplement (doi:10.3390/plants11060804), 2022-03-17
Supplement: s1 [file s1]

**Table S1.** Two-way ANOVA analysis of the morpho-physiological traits, comparisons within genotypes. The effect of a single variable (water status or genotype or AMF) and the variable interaction (water status x AMF) was considered. Significant effects ( $p$  value < 0.05, 0.01, 0.001) are highlighted in bold.

| $p$ -values | Etrusco                        |                               |             | Svevo                          |                                |                                |
|-------------|--------------------------------|-------------------------------|-------------|--------------------------------|--------------------------------|--------------------------------|
|             | Water status                   | AMF                           | Interaction | Water status                   | AMF                            | Interaction                    |
| RL          | $p>0,05$                       | $p>0,05$                      | $p>0,05$    | $p>0,05$                       | <b><math>p&lt;0,001</math></b> | $p>0,05$                       |
| SL          | <b><math>p&lt;0,001</math></b> | $p>0,05$                      | $p>0,05$    | <b><math>p&lt;0,001</math></b> | <b><math>p&lt;0,01</math></b>  | $p>0,05$                       |
| RFW         | <b><math>p&lt;0,001</math></b> | <b><math>p&lt;0,01</math></b> | $p>0,05$    | <b><math>p&lt;0,001</math></b> | <b><math>p&lt;0,01</math></b>  | $p>0,05$                       |
| SFW         | <b><math>p&lt;0,001</math></b> | $p>0,05$                      | $p>0,05$    | <b><math>p&lt;0,001</math></b> | <b><math>p&lt;0,001</math></b> | <b><math>p&lt;0,01</math></b>  |
| RWC         | <b><math>p&lt;0,001</math></b> | $p>0,05$                      | $p>0,05$    | <b><math>p&lt;0,001</math></b> | <b><math>p&lt;0,05</math></b>  | <b><math>p&lt;0,001</math></b> |

**Table S2.** Two-way ANOVA analysis of the relative expression of genes involved in water stress response and sulfur assimilation, comparisons within genotypes. The effect of a single variable (water status or genotype or AMF) and the variable interaction (water status x AMF) was considered. Significant effects ( $p$  value < 0.05, 0.01, 0.001) are highlighted in bold.

| $p$ -values       | Etrusco                        |                                |                                | Svevo                          |                                |                               |
|-------------------|--------------------------------|--------------------------------|--------------------------------|--------------------------------|--------------------------------|-------------------------------|
|                   | Water status                   | AMF                            | Interaction                    | Water status                   | AMF                            | Interaction                   |
| <i>TdSHN1</i>     | <b><math>p&lt;0,001</math></b> | <b><math>p&lt;0,05</math></b>  | $p>0,05$                       | <b><math>p&lt;0,001</math></b> | $p>0,05$                       | <b><math>p&lt;0,05</math></b> |
| <i>TdDRF1</i>     | <b><math>p&lt;0,001</math></b> | $p>0,05$                       | <b><math>p&lt;0,05</math></b>  | <b><math>p&lt;0,01</math></b>  | $p>0,05$                       | <b><math>p&lt;0,01</math></b> |
| <i>TdOASTL1</i>   | $p>0,05$                       | <b><math>p&lt;0,01</math></b>  | $p>0,05$                       | $p>0,05$                       | $p>0,05$                       | $p>0,05$                      |
| <i>TdSAT1</i>     | <b><math>p&lt;0,05</math></b>  | <b><math>p&lt;0,05</math></b>  | <b><math>p&lt;0,01</math></b>  | <b><math>p&lt;0,05</math></b>  | <b><math>p&lt;0,01</math></b>  | <b><math>p&lt;0,01</math></b> |
| <i>TdSULTR1.1</i> | <b><math>p&lt;0,01</math></b>  | $p>0,05$                       | <b><math>p&lt;0,01</math></b>  | $p>0,05$                       | $p>0,05$                       | $p>0,05$                      |
| <i>TdSULTR1.3</i> | <b><math>p&lt;0,001</math></b> | <b><math>p&lt;0,001</math></b> | <b><math>p&lt;0,001</math></b> | <b><math>p&lt;0,001</math></b> | <b><math>p&lt;0,001</math></b> | $p>0,05$                      |

**Table S3.** Two-way ANOVA analysis of the relative expression of genes involved in mycorrhizal colonization. The effect of a single variable (water status or genotype) and the variable interaction (water status x genotype) was considered. Significant effects ( $p$  value < 0.05, 0.01, 0.001) are highlighted in bold.

| $p$ -values   | AMF                            |                                |                               |
|---------------|--------------------------------|--------------------------------|-------------------------------|
|               | Water status                   | Genotype                       | Interaction                   |
| <i>Fm18S</i>  | <b><math>p&lt;0,001</math></b> | <b><math>p&lt;0,001</math></b> | <b><math>p&lt;0,01</math></b> |
| <i>TdPT11</i> | <b><math>p&lt;0,01</math></b>  | <b><math>p&lt;0,05</math></b>  | <b><math>p&lt;0,05</math></b> |

**Table S4.** Two-way ANOVA analysis of colonization level parameters. The effect of a single variable (water status or genotype) and the variable interaction (water status x genotype) was considered. Significant effects ( $p$  value < 0.05, 0.01, 0.001) are highlighted in bold.

| $p$ -values | AMF                            |                               |                                |
|-------------|--------------------------------|-------------------------------|--------------------------------|
|             | Water status                   | Genotype                      | Interaction                    |
| F (%)       | <b><math>p&lt;0,001</math></b> | <b><math>p&lt;0,01</math></b> | <b><math>p&lt;0,001</math></b> |
| A (%)       | <b><math>p&lt;0,001</math></b> | $p>0,05$                      | $p>0,05$                       |

**Table S5.** Two-way ANOVA analysis of the cations concentration, comparisons within genotypes. The effect of a single variable (water status or genotype or AMF) and the variable interaction (water status x AMF) was considered. Significant effects ( $p$  value < 0.05, 0.01, 0.001) are highlighted in bold.

| $p$ -values                      | Etrusco                       |          |             | Svevo                          |                                |                                |
|----------------------------------|-------------------------------|----------|-------------|--------------------------------|--------------------------------|--------------------------------|
|                                  | Water status                  | AMF      | Interaction | Water status                   | AMF                            | Interaction                    |
| K <sup>+</sup>                   | $p>0,05$                      | $p>0,05$ | $p>0,05$    | <b><math>p&lt;0,001</math></b> | <b><math>p&lt;0,001</math></b> | $p>0,05$                       |
| Na <sup>+</sup>                  | <b><math>p&lt;0,01</math></b> | $p>0,05$ | $p>0,05$    | <b><math>p&lt;0,01</math></b>  | <b><math>p&lt;0,001</math></b> | <b><math>p&lt;0,001</math></b> |
| Ca <sup>2+</sup>                 | <b><math>p&lt;0,01</math></b> | $p>0,05$ | $p>0,05$    | <b><math>p&lt;0,001</math></b> | $p>0,05$                       | <b><math>p&lt;0,05</math></b>  |
| Mg <sup>2+</sup>                 | $p>0,05$                      | $p>0,05$ | $p>0,05$    | <b><math>p&lt;0,01</math></b>  | $p>0,05$                       | <b><math>p&lt;0,05</math></b>  |
| Na <sup>+</sup> / K <sup>+</sup> | <b><math>p&lt;0,01</math></b> | $p>0,05$ | $p>0,05$    | <b><math>p&lt;0,001</math></b> | <b><math>p&lt;0,001</math></b> | <b><math>p&lt;0,001</math></b> |

**Table S6.** Two-way ANOVA analysis of the anions concentration, comparisons within genotypes. The effect of a single variable (water status or genotype or AMF) and the variable interaction (water status x AMF) was considered. Significant effects ( $p$  value < 0.05, 0.001, 0.001) are highlighted in bold.

| $p$ -values                   | Etrusco                       |                                |                                | Svevo                          |                                |                                |
|-------------------------------|-------------------------------|--------------------------------|--------------------------------|--------------------------------|--------------------------------|--------------------------------|
|                               | Water status                  | AMF                            | Interaction                    | Water status                   | AMF                            | Interaction                    |
| Cl <sup>-</sup>               | $p>0,05$                      | $p>0,05$                       | <b><math>p&lt;0,001</math></b> | $p>0,05$                       | <b><math>p&lt;0,01</math></b>  | $p>0,05$                       |
| SO <sub>4</sub> <sup>2-</sup> | <b><math>p&lt;0,01</math></b> | <b><math>p&lt;0,001</math></b> | <b><math>p&lt;0,01</math></b>  | <b><math>p&lt;0,001</math></b> | <b><math>p&lt;0,001</math></b> | <b><math>p&lt;0,01</math></b>  |
| NO <sub>3</sub> <sup>-</sup>  | $p>0,05$                      | $p>0,05$                       | $p>0,05$                       | <b><math>p&lt;0,001</math></b> | <b><math>p&lt;0,001</math></b> | <b><math>p&lt;0,001</math></b> |
| PO <sub>4</sub> <sup>3-</sup> | $p>0,05$                      | <b><math>p&lt;0,05</math></b>  | $p>0,05$                       | <b><math>p&lt;0,05</math></b>  | <b><math>p&lt;0,01</math></b>  | $p>0,05$                       |
| S index                       | $p>0,05$                      | <b><math>p&lt;0,01</math></b>  | <b><math>p&lt;0,001</math></b> | $p>0,05$                       | <b><math>p&lt;0,001</math></b> | $p>0,05$                       |

**Table S7.** Primers used for qRT-PCR analysis.

| Gene              | Primer name | Sequence                 |
|-------------------|-------------|--------------------------|
| <i>TdSHN1</i>     | TdSHN1F     | GCTACTCATGAAACTCCACAGTGC |
|                   | TdSHN1R     | TGGATCTCGACTGGTCAAACCAA  |
| <i>TdDRF1</i>     | TdDRF1F     | GGGTTTCGAAATCGGTTTCGGG   |
|                   | TdDRF1R     | CAACACAGGCACCAAGACCG     |
| <i>TdPT11</i>     | TdPT11F     | TGCATGACACCACGCATCTTATC  |
|                   | TdPT11R     | GGTATCACACACAAGCAATCCTA  |
| <i>Fm18S</i>      | Fm18SF      | CCTTTTGAGCTCGGTCTCGTG    |
|                   | Fm18SR      | TGGTCCGTGTTTCAAGACG      |
| <i>TdSULTR1.1</i> | TdSULTR1.1F | CTATGAGACAGCCTACCTTATATG |
|                   | TdSULTR1.1R | CAACCGCAATGAGCAAGC       |
| <i>TdSULTR1.3</i> | TdSULTR1.3F | ATGTCAGTGGTGGTTCTTC      |
|                   | TdSULTR1.3R | ATTGCTGCTTCGTAGTCC       |
| <i>TdOASTL1</i>   | TdOASTL1F   | GCCCAGAGACCCGAGAAC       |
|                   | TdOASTL1R   | AACAGCACCGACGACAGG       |
| <i>TdSAT1</i>     | TdSAT1F     | GTCTCCATCCTCCACCAC       |
|                   | TdSAT1R     | GCACATCTATCAGCACCAC      |
| <i>GADPH</i>      | GADPHF      | GGTTTGGCATTGTTGAGGGTTT   |
|                   | GADPHR      | GGAATGATGTTGAAGCTGGCAG   |

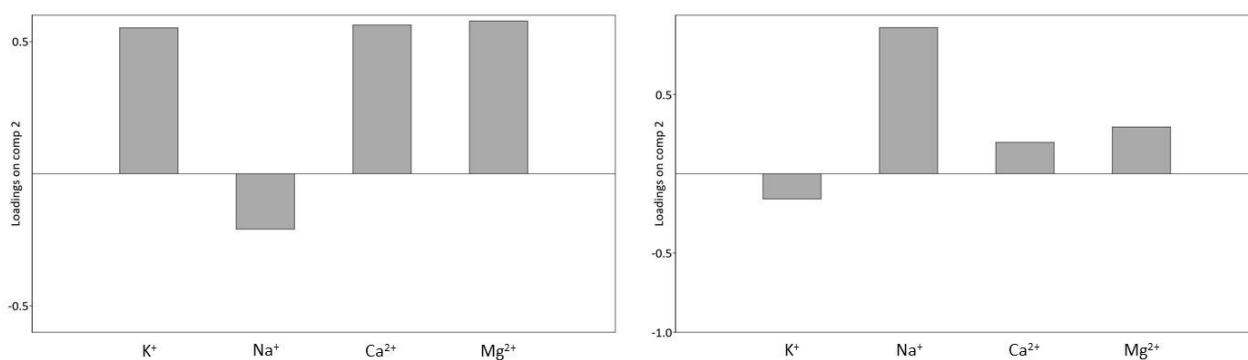

**Figure S1.** The loading plots of each cations concentration in components 1 and 2, respectively, the bar length representing regression coefficients with either positive or negative signs.

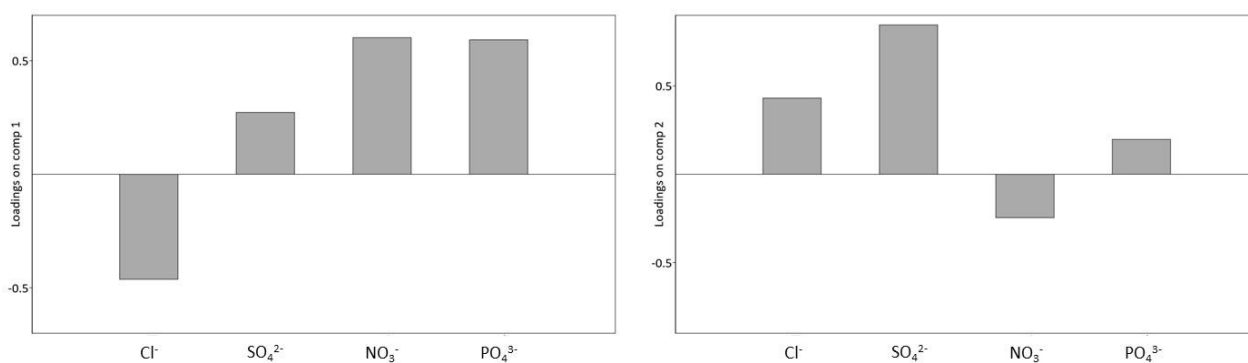

**Figure S2.** The loading plots of each anions concentration in components 1 and 2, respectively, the bar length representing regression coefficients with either positive or negative signs.
